# Supplementary material for: Tomm34 is commonly expressed in epithelial ovarian cancer and associates with tumour type and high FIGO stage
Source: Springer Nature journal article supplement (doi:10.1186/s13048-019-0498-0), 2019-03-27
Supplement: MOESM1 [file 16579556]

| Patient No. | Age at time of surgery | FIGO  | CA125 value at time of surgery [U/ml] | Residual disease | Therapy response | Progression | Progression free survival [months] | Overall survival [months] | Dead | Histological subtype | Type | Grade | p53 mutation | Tomm34 histoscore |
|-------------|------------------------|-------|---------------------------------------|------------------|------------------|-------------|------------------------------------|---------------------------|------|----------------------|------|-------|--------------|-------------------|
| 1           | 60                     | IV    | 1995,9                                | Yes              | RESITANT         | Yes         | 26                                 | 89                        | No   | HGSC                 | 2    | 3     | MIS          | 1                 |
| 2           | 55                     | IIB   | 201                                   | No               | SENSITIV         | Yes         | 67                                 | 85                        | Yes  | MOC                  | 1    | 1     | WT           | 1                 |
| 3           | 56                     | IIIC  | 3206                                  | No               | SENSITIV         | No          | 62                                 | 62                        | No   | HGSC                 | 2    | 3     | DEL          | 2                 |
| 4           | 41                     | IA    | 146,6                                 | No               |                  | Yes         | 17                                 | 27                        | No   | SET                  | 2    | 2     | MIS          | 3                 |
| 5           | 64                     | IIIC  | 115,4                                 | Yes              | RESITANT         | Yes         | 17                                 | 30                        | Yes  | HGSC                 | 2    | 3     | NONSENSE     | 3                 |
| 6           | 70                     | IV    | 2043,2                                | Yes              | SENSITIV         | No          | 120                                | 120                       | No   | HGSC                 | 2    | 3     | NONSENSE     | 2                 |
| 7           | 39                     | IIIA  | 72,6                                  | Yes              | SENSITIV         | Yes         | 22                                 | 47                        | Yes  | HGSC                 | 2    | 3     | MIS          | 3                 |
| 8           | 54                     | IA    | 53,1                                  | No               |                  | Yes         | 57                                 | 74                        | No   | MOC                  | 1    | 1     | WT           | 0                 |
| 9           | 50                     | IIIC  | 5090,3                                | Yes              | SENSITIV         | No          | 80                                 | 80                        | No   | HGSC                 | 2    | 3     | NONSENSE     | 2                 |
| 10          | 58                     | IIIA  | 770,9                                 | No               |                  | No          | 133                                | 133                       | No   | CCOC                 | 1    | 3     | WT           | 0                 |
| 11          | 55                     | IIIC  | 4695,6                                | Yes              | SENSITIV         | Yes         | 17                                 | 29                        | Yes  | HGSC                 | 2    | 3     | MIS          | 1                 |
| 12          | 72                     | IV    | 625                                   | Yes              | SENSITIV         |             |                                    | 79                        | No   | HGSC                 | 2    | 3     | MIS          | 3                 |
| 13          | 65                     | IIIC  | 218                                   | No               |                  | No          | 49                                 | 49                        | No   | HGSC                 | 2    | 3     | WT           | 3                 |
| 14          | 56                     | IA    | 465,5                                 | No               | REFRACT          | No          | 71                                 | 71                        | No   | HGSC                 | 2    | 3     |              | 3                 |
| 15          | 74                     | IA    | 82                                    | No               |                  | Yes         | 86                                 | 109                       | No   | MOC                  | 1    | 2     | WT           | 1                 |
| 16          | 60                     | IIC   | 351,6                                 | No               | SENSITIV         | No          | 103                                | 103                       | No   | HGSC                 | 2    | 3     | NONSENSE     | 2                 |
| 17          | 36                     | IIIC  | 98                                    | No               | SENSITIV         | Yes         | 19                                 | 44                        | Yes  | LGSC                 | 1    | 1     | WT           | 1                 |
| 18          | 53                     | IV    | 2483,7                                | Yes              | RESITANT         | No          | 69                                 | 69                        | No   | HGSC                 | 2    | 3     | DEL          | 3                 |
| 19          | 60                     | IV    | 2823,4                                | Yes              | SENSITIV         | Yes         | 74                                 | 74                        | Yes  | HGSC                 | 2    | 3     | MIS          | 2                 |
| 20          | 57                     | IV    | 20930,2                               | Yes              | SENSITIV         | No          | 123                                | 123                       | No   | HGSC                 | 2    | 3     | MIS          | 1                 |
| 21          | 64                     | IIIC  | 2611,9                                | Yes              | SENSITIV         | Yes         | 51                                 | 106                       | No   | HGSC                 | 2    | 3     | DEL          | 2                 |
| 22          | 45                     | IIIC  | 52                                    | No               | SENSITIV         | Yes         | 18                                 | 38                        | Yes  | HGSC                 | 2    | 3     | MIS          | 3                 |
| 23          | 63                     | IIIC  | 133                                   | Yes              | SENSITIV         | Yes         | 38                                 | 41                        | Yes  | HGSC                 | 2    | 3     | NONSENSE     | 3                 |
| 24          | 63                     | IIIB  | 163                                   | Yes              | REFRACT          | Yes         | 3                                  | 3                         | Yes  | MOC                  | 1    | 1     | WT           | 0                 |
| 25          | 53                     | III C | 132,66                                | No               | SENSITIV         | Yes         | 8                                  | 52                        | Yes  | ENOC                 | 2    | 2     | WT           | 2                 |
| 26          | 42                     | IIIC  | 3070,6                                | No               | SENSITIV         | Yes         | 36                                 | 112                       | Yes  | LGSC                 | 1    | 2     | WT           | 2                 |
| 27          | 67                     | IIIC  | 5887,5                                | Yes              | SENSITIV         | Yes         | 24                                 | 53                        | Yes  | SET                  | 2    | 3     | MIS          | 3                 |
| 28          | 65                     | IIC   | 440                                   | No               | SENSITIV         | Yes         | 53                                 | 71                        | Yes  | LGSC                 | 1    | 1     | WT           | 1                 |
| 29          | 66                     | IB    | 1896,7                                | No               | SENSITIV         | No          | 122                                | 122                       | No   | MOC                  | 1    | 3     | MIS          | 2                 |
| 30          | 46                     | IIIA  | 6794,4                                | No               | SENSITIV         | Yes         | 20                                 | 41                        | Yes  | HGSC                 | 2    | 3     | NONSENSE     | 3                 |
| 31          | 48                     | IA    | 43,2                                  | No               | SENSITIV         | Yes         | 17                                 | 17                        | Yes  | HGSC                 | 2    | 3     | MIS          | 2                 |
| 32          | 79                     | IIIA  | 21,8                                  | No               | SENSITIV         | Yes         | 18                                 | 18                        | Yes  | SET                  | 2    | 3     | NONSENSE     | 2                 |
| 33          | 53                     | IB    | 49                                    | No               | SENSITIV         | No          | 49                                 | 49                        | No   | LGSC                 | 1    | 1     | MIS          | 2                 |
| 34          | 37                     | IIIC  | 150                                   | No               | SENSITIV         | No          | 77                                 | 77                        | No   | LGSC                 | 1    | 2     | WT           | 1                 |
| 35          |                        | ND    |                                       |                  |                  | No          | 75                                 | 75                        | No   | LGSC                 | 1    | 1     |              | 2                 |
| 36          | 46                     | IV    | 3327,4                                | No               | SENSITIV         | Yes         | 10                                 | 23                        | Yes  | HGSC                 | 2    | 3     | MIS          | 2                 |
| 37          | 42                     | IIIC  | 2397,7                                | Yes              | SENSITIV         | No          | 65                                 |                           |      | HGSC                 | 2    | 3     | MIS          | 2                 |
| 38          | 58                     | IIIC  | 259                                   | Yes              | RESITANT         | No          | 105                                | 105                       | No   | LGSC                 | 1    | 1     |              | 2                 |
| 39          | 47                     | IIC   | 220,9                                 | No               |                  | No          | 52                                 | 52                        | No   | CCOC                 | 1    | 3     | SIL          | 0                 |
| 40          | 59                     | IIIC  |                                       |                  | REFRACT          | Yes         | 17                                 | 17                        | Yes  | LGSC                 | 1    | 1     | WT           | 2                 |
| 41          |                        | ND    |                                       |                  |                  | Yes         | 9                                  | 40                        | Yes  | HGSC                 | 2    | 3     |              | 2                 |
| 42          | 74                     | IA    |                                       | No               | SENSITIV         | No          | 124                                | 124                       | No   | CCOC                 | 1    | 1     | WT           | 0                 |
| 43          | 40                     | IIIC  | 1382                                  | No               | RESITANT         | Yes         | 6                                  | 6                         | Yes  | HGSC                 | 2    | 3     | MIS          | 1                 |
| 44          | 59                     | IIIC  | 41                                    | No               | SENSITIV         | Yes         | 1                                  | 1                         | Yes  | HGSC                 | 2    | 3     | WT           | 1                 |
| 45          | 61                     | IA    | 184,3                                 | No               | SENSITIV         |             |                                    | 106                       | No   | HGSC                 | 2    | 2     | MIS          | 3                 |
| 46          | 66                     | IIIC  | 4000                                  | Yes              | SENSITIV         | Yes         | 2                                  | 2                         | Yes  | HGSC                 | 2    | 3     | MIS          | 1                 |
| 47          | 53                     | IV    | 2160                                  | Yes              | SENSITIV         | No          | 64                                 | 64                        | No   | HGSC                 | 2    | 3     | MIS          | 3                 |

| Patient No. | Age at time of surgery | FIGO   | CA125 value at time of surgery [U/ml] | Residual disease | Therapy response | Progression | Progression free survival [months] | Overall survival [months] | Dead | Histological subtype | Type | Grade | p53 mutation | Tomm34 histoscore |
|-------------|------------------------|--------|---------------------------------------|------------------|------------------|-------------|------------------------------------|---------------------------|------|----------------------|------|-------|--------------|-------------------|
| 48          | 68                     | IIIC   | 499,2                                 | Yes              | RESITANT         | Yes         | 12                                 | 56                        | Yes  | HGSC                 | 2    | 3     | DEL          | 3                 |
| 49          | 56                     | IC     | 124                                   | No               | SENSITIV         |             |                                    | 57                        | No   | HGSC                 | 2    | 3     | NONSENSE     | 3                 |
| 50          | 62                     | IIIC   | 114                                   | No               |                  |             |                                    |                           |      | CCOC                 | 1    | 2     | WT           | 1                 |
| 51          | 62                     | IV     | 1386                                  | No               | RESITANT         | Yes         | 5                                  | 13                        | Yes  | SET                  | 2    | 3     | MIS          | 3                 |
| 52          | 59                     | IIIC   | 267                                   | No               | REFRACT          | No          | 59                                 | 59                        | No   | CCOC                 | 1    | 2     | MIS          | 1                 |
| 53          | 64                     | IC     | 69                                    | No               | SENSITIV         | Yes         | 16                                 | 30                        | Yes  | HGSC                 | 2    | 3     | WT           | 3                 |
| 54          | 63                     | IIIC   | 40                                    | No               | SENSITIV         | Yes         | 42                                 | 57                        | No   | HGSC                 | 2    | 3     | MIS          | 3                 |
| 55          | 80                     | IB     | 24                                    | No               | SENSITIV         | Yes         | 9                                  | 11                        | Yes  | LGSC                 | 1    | 1     | MIS          | 1                 |
| 56          | 54                     | IC     |                                       | No               | SENSITIV         | Yes         | 30                                 | 82                        | No   | ENOC                 | 1    | 1     | WT           | 0                 |
| 57          | 43                     | IIIC   | 1481                                  | No               | SENSITIV         | Yes         | 7                                  | 51                        | No   | HGSC                 | 2    | 3     | MIS          | 3                 |
| 58          | 53                     | IIIC   |                                       | Yes              | SENSITIV         | Yes         | 5                                  | 5                         | Yes  | HGSC                 | 2    | 3     | NONSENSE     | 2                 |
| 59          | 67                     | IC     | 261                                   | No               | RESITANT         | Yes         | 27                                 | 32                        | Yes  | LGSC                 | 1    | 1     | WT           | 1                 |
| 60          | 49                     | IC     | 17,7                                  | No               | SENSITIV         | No          | 83                                 | 83                        | No   | ENOC                 | 1    | 1     | WT           | 3                 |
| 61          | 70                     | IIC    | 197,1                                 |                  | SENSITIV         | Yes         | 45                                 | 60                        | Yes  | LGSC                 | 1    | 2     | MIS          | 2                 |
| 62          | 59                     | IC     | 242                                   | No               |                  | Yes         | 19                                 |                           |      | HGSC                 | 2    | 3     | WT           | 0                 |
| 63          | 53                     | IIIC   | 4528                                  | Yes              | SENSITIV         | Yes         | 11                                 | 23                        | Yes  | HGSC                 | 2    | 3     | WT           | 3                 |
| 64          | 58                     | IV     | 427,5                                 | Yes              | RESITANT         | Yes         | 45                                 | 90                        | No   | HGSC                 | 2    | 3     | MIS          | 3                 |
| 65          | 70                     | IIIC   | 42415,1                               | No               |                  | Yes         | 24                                 | 66                        | Yes  | HGSC                 | 2    | 3     | MIS          | 2                 |
| 66          | 59                     | IA     | 276,1                                 | No               | SENSITIV         | Yes         | 16                                 | 42                        | Yes  | CCOC                 | 1    | 3     | WT           | 2                 |
| 67          | 53                     | IIIB   | 458,4                                 | No               | SENSITIV         | Yes         | 9                                  | 17                        | Yes  | LGSC                 | 1    | 1     | NONSENSE     | 0                 |
| 68          | 60                     | IV     | 216,7                                 | Yes              | RESITANT         | No          | 134                                | 134                       | No   | MOC                  | 1    | 3     | MIS          | 0                 |
| 69          | 62                     | IIIC   | 199,6                                 | Yes              | RESITANT         | Yes         | 6                                  | 17                        | Yes  | CCOC                 | 1    | 3     | WT           | 1                 |
| 70          | 59                     | IIC    | 677,5                                 | No               | SENSITIV         | Yes         | 32                                 | 85                        | No   | HGSC                 | 2    | 3     | NONSENSE     | 2                 |
| 71          | 29                     | IIIC   | 313,6                                 | No               | SENSITIV         | Yes         | 2                                  | 2                         | Yes  | HGSC                 | 2    | 3     | MIS          | 3                 |
| 72          | 70                     | IIB    | 1019,1                                | No               |                  | Yes         | 27                                 | 72                        | Yes  | HGSC                 | 2    | 3     | DEL          | 1                 |
| 73          | 56                     | IA     | 290                                   | No               | SENSITIV         | Yes         | 10                                 | 27                        | Yes  | HGSC                 | 2    | 2     | DEL          | 1                 |
| 74          | 59                     | IIIC   | 588,9                                 | No               | SENSITIV         | No          | 60                                 | 60                        | No   | HGSC                 | 2    | 3     | NONSENSE     | 3                 |
| 75          |                        | IIIC   |                                       |                  |                  | Yes         | 17                                 | 22                        | Yes  | HGSC                 | 2    | 2     |              | 2                 |
| 76          | 78                     | IIIB   | 341,6                                 | Yes              | RESITANT         | Yes         | 33                                 | 111                       | Yes  | HGSC                 | 2    | 2     | MIS          | 3                 |
| 77          | 76                     | IIC    | 113,3                                 | Yes              | SENSITIV         | No          | 73                                 | 73                        | No   | HGSC                 | 2    | 3     | MIS          | 1                 |
| 78          | 58                     | III-IV | 9734                                  | Yes              |                  | Yes         | 12                                 | 12                        | Yes  | HGSC                 | 2    | 3     | MIS          | 3                 |
| 79          | 63                     | IIIC   | 2225                                  | No               | SENSITIV         | Yes         | 42                                 | 113                       | No   | HGSC                 | 2    | 3     | MIS          | 1                 |
| 80          | 53                     | IIIC   | 101,7                                 | No               | SENSITIV         | Yes         | 42                                 | 42                        | Yes  | SET                  | 2    | 3     | MIS          | 2                 |
| 81          | 62                     | IA     | 4276,9                                | No               |                  | No          | 115                                | 115                       | No   | LGSC                 | 1    | 1     | WT           | 3                 |
| 82          | 49                     | IIIC   | 2964,2                                | Yes              | SENSITIV         | Yes         | 43                                 | 60                        | No   | SET                  | 2    | 3     | DEL          | 2                 |
| 83          | 70                     | IIIC   | 500,4                                 | Yes              | SENSITIV         | Yes         | 7                                  | 25                        | Yes  | HGSC                 | 2    | 3     | NONSENSE     | 2                 |
| 84          | 55                     | IIIC   | 1394,3                                | No               | RESITANT         | Yes         | 28                                 | 58                        | Yes  | HGSC                 | 2    | 3     | MIS          | 2                 |
| 85          | 52                     | IIIC   | 113,1                                 | Yes              | SENSITIV         | Yes         | 47                                 | 59                        | No   | SET                  | 2    | 3     | MIS          | 1                 |
| 86          | 52                     | IIIC   | 219,5                                 | No               |                  | No          | 114                                | 114                       | No   | LGSC                 | 1    | 2     | WT           | 1                 |
| 87          | 65                     | IC     | 1094,2                                | No               | SENSITIV         | Yes         | 22                                 | 24                        | Yes  | HGSC                 | 2    | 3     | MIS          | 2                 |
| 88          | 66                     | IA     | 54,5                                  | No               | SENSITIV         | Yes         | 7                                  | 9                         | Yes  | CCOC                 | 1    | 3     | WT           | 1                 |
| 89          | 62                     | IIIC   | 1000                                  | Yes              | SENSITIV         | Yes         | 11                                 | 19                        | Yes  | CCOC                 | 1    | 3     | WT           | 1                 |
| 90          | 81                     | IA     | 146,5                                 | No               | SENSITIV         | Yes         | 11                                 | 22                        | Yes  | MOC                  | 1    | 1     |              | 0                 |
| 91          | 76                     | IV     | 19690,3                               | Yes              | SENSITIV         | Yes         | 27                                 | 81                        | No   | HGSC                 | 2    | 2     | NONSENSE     | 2                 |
| 92          | 73                     | IIIC   | 277,9                                 | No               | SENSITIV         | Yes         | 56                                 | 56                        | Yes  | HGSC                 | 2    | 3     | NONSENSE     | 3                 |
| 93          | 66                     | IC     | 139,1                                 | No               | SENSITIV         | Yes         | 11                                 | 66                        | Yes  | LGSC                 | 1    | 1     |              | 1                 |
| 94          | 55                     | III-IV | 1327,2                                | No               | SENSITIV         | Yes         | 11                                 | 20                        | Yes  | ENOC                 | 1    | 2     | WT           | 3                 |
