# Supplementary material for: Tomm34 is commonly expressed in epithelial ovarian cancer and associates with tumour type and high FIGO stage
Source: Springer Nature journal article supplement (doi:10.1186/s13048-019-0498-0), 2019-03-27
Supplement: MOESM2 [file 16579556]

**A****Overall survival OS**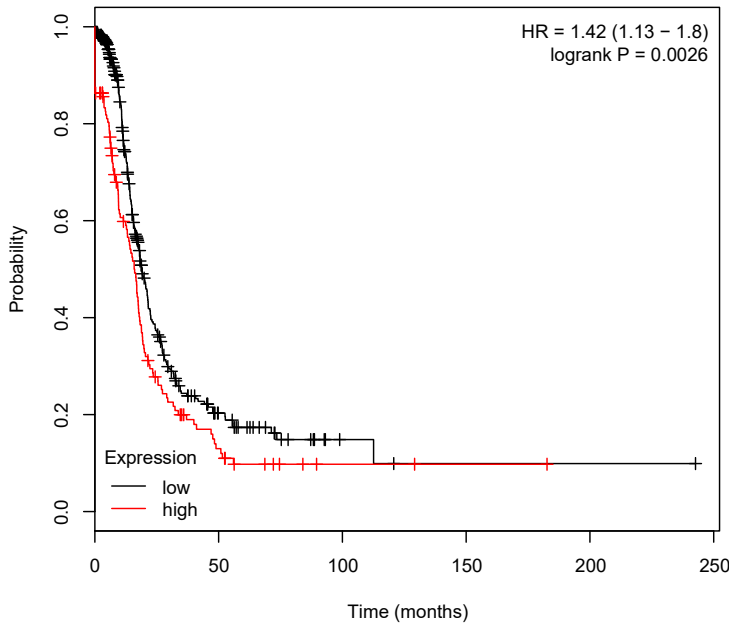

Affymetrix ID: 201870\_at TOMM34

Survival: Overall survival OS

Number of cases: 506

Cutoff value used in analysis: 1041

Expression range of the probe: 243 - 3252

TP53 mutation: mutated

**P value: 0.0363**

FDR: over 50%

**B****Progression free survival PFS**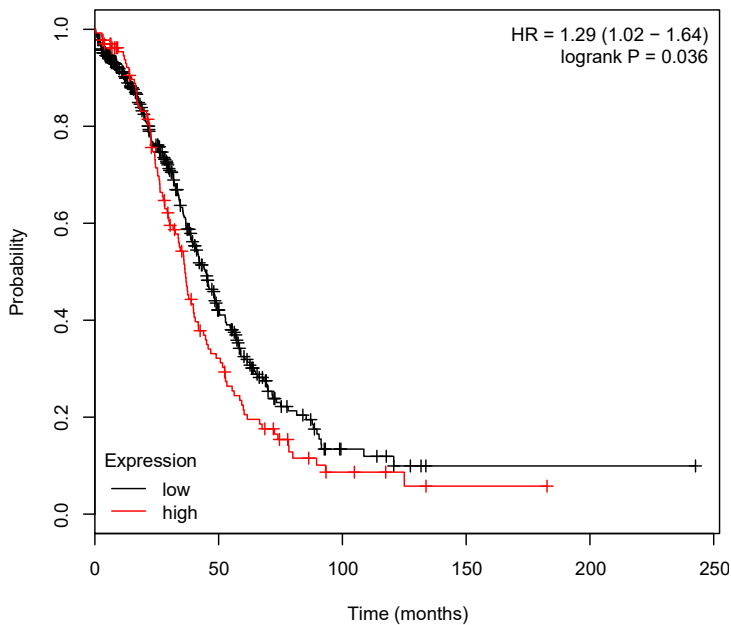

Affymetrix ID: 201870\_at TOMM34

Survival: Progression free survival PFS

Number of cases: 483

Cutoff value used in analysis: 1026

Expression range of the probe: 243 - 3252

TP53 mutation: mutated

**P value: 0.0026**

FDR: over 50%

C

### Post progression survival PPS

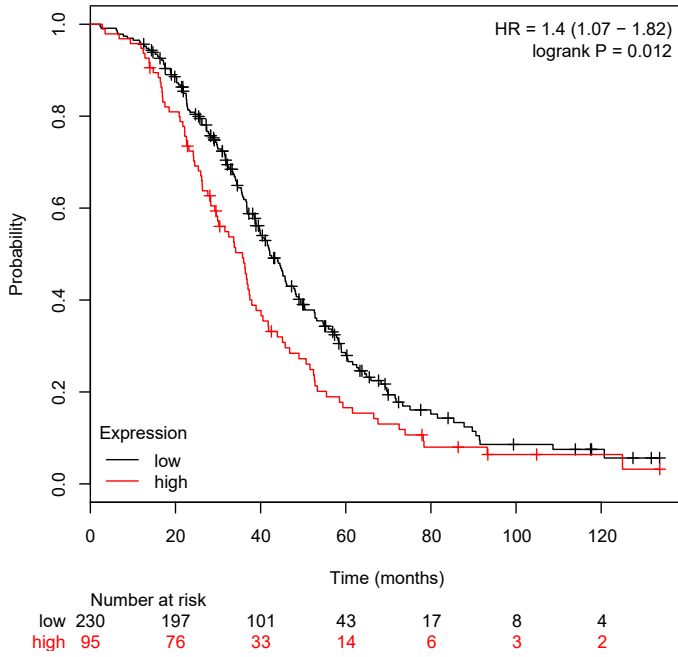

Affymetrix ID: 201870\_at TOMM34  
Survival: Post progression survival PPS  
Number of samples: 325  
Cutoff value used in analysis: 1094  
Expression range of the probe: 244 - 3252  
TP53 mutation: mutated  
**P value: 0.0121**  
FDR: over 50%
