# Supplementary material for: Tomm34 is commonly expressed in epithelial ovarian cancer and associates with tumour type and high FIGO stage
Source: Springer Nature journal article supplement (doi:10.1186/s13048-019-0498-0), 2019-03-27
Supplement: MOESM3 [file 16579556]

## Additional file 3

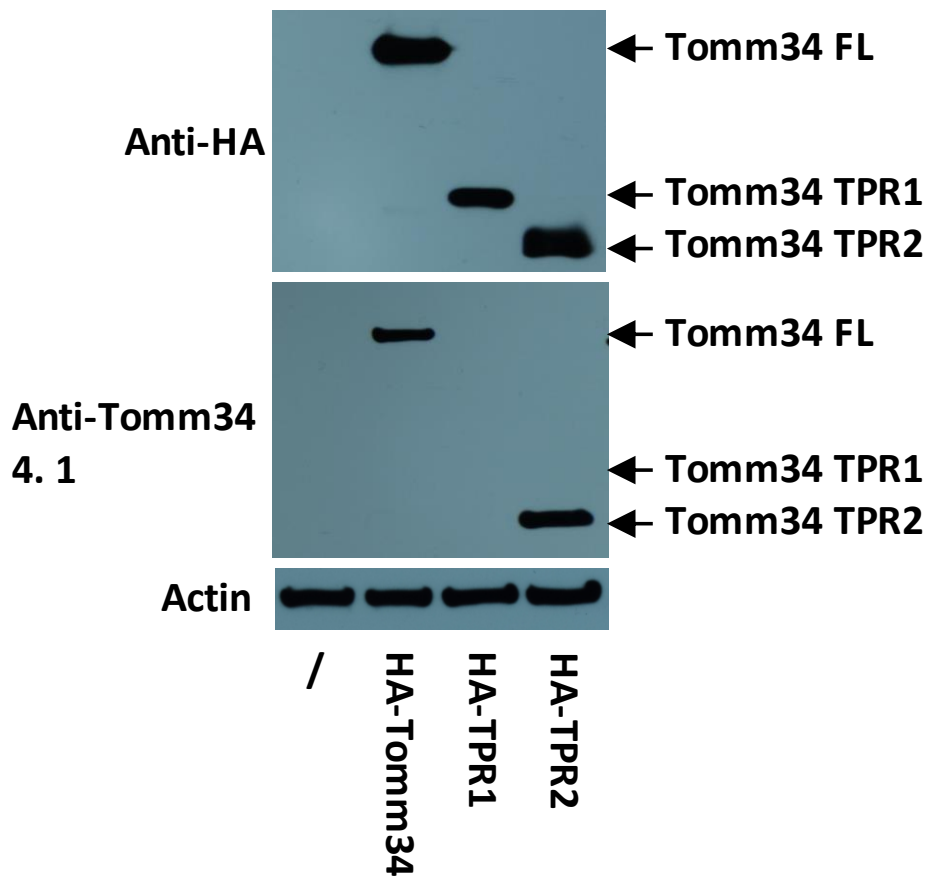

**Characterization of Tomm34.4.1 antibody.** MCF7 cells with knockout expression of *Tomm34* gene were transfected with constructs encoding HA-tag labeled full-length Tomm34 protein and its TPR1 (aa 1-188) and TPR2 (188-309) domains. Next, non-transfected and transfected cell lysates were separated by SDS-PAGE, blotted and the membranes were probed with either anti-HA tag antibody or anti-Tomm34 4.1 monoclonal antibody. Protein loading was tested by probing the membrane with anti-Actin antibody.
